# Supplementary material for: Identification of a novel intronic variant in COL4A2 gene associated with fetal severe cerebral encephalomalacia and subdural hemorrhage
Source: PubMed Central journal article supplement — BMC Med Genomics. 2024 Sep 30;17:238. doi: 10.1186/s12920-024-02012-4 (PMC11441077; doi:10.1186/s12920-024-02012-4), 2024-09-30
Supplement: 12920_2024_2012_MOESM1_ESM.pdf [file 12920_2024_2012_MOESM1_ESM.pdf]

**Identification of a novel intronic variant in *COL4A2* gene associated with fetal severe cerebral encephalomalacia and subdural hemorrhage**

Rong-Yue Sun<sup>1\*</sup>, Yue Xu<sup>1\*</sup>, Qing-Qing Huang<sup>1\*</sup>, Si-Si Hu<sup>1</sup>, Hua-Zhi Xu<sup>2</sup>, Yan-Zhao Luo<sup>3</sup>, Ting Zhu<sup>1</sup>, Jun-Hui Sun<sup>4</sup>, Yu-Jing Gong<sup>1</sup>, Mian-Mian Zhu<sup>1</sup>, Hong-Wei Wang<sup>5</sup>, Jing-Ye Pan<sup>6, 7</sup>, Chao-Sheng Lu<sup>1#</sup>, Dan Wang<sup>1#</sup>

**Supplementary Figure:**

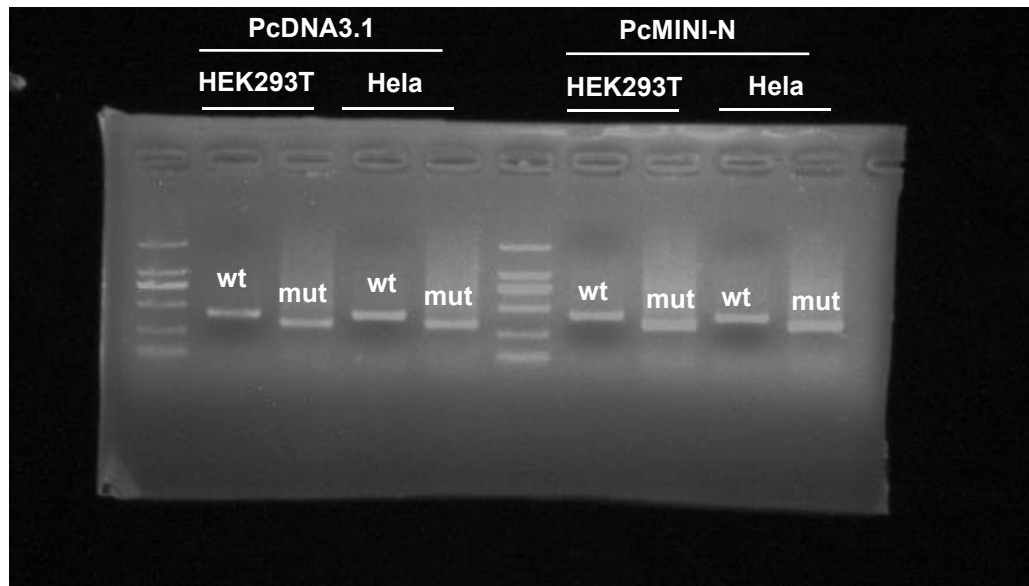

**Figure legend:** Gel electrophoresis of reverse transcription polymerase chain reaction products from two types of plasmid vectors (PcDNA3.1 and PcMINI-N) displayed a single band from the wild type (wt) and a smaller band in the mutant type (mut).
